# Supplementary material
Source: PubMed Central journal article supplement (PMC7054367)
Supplement: 41422_2020_279_MOESM2_ESM.pdf [file 41422_2020_279_MOESM2_ESM.pdf]

**a**

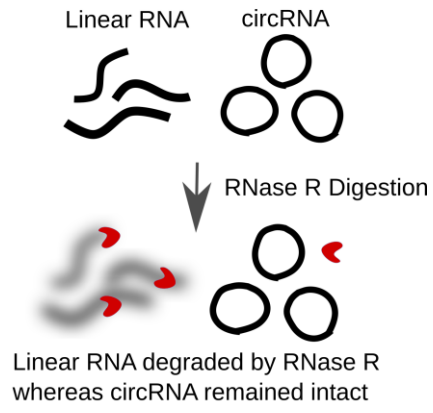

**b**

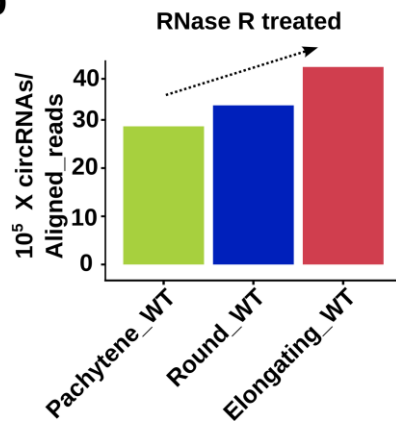

**Fig.S2. CircRNA identification using a RNase R treatment-based RNA-Seq.** **a** Schematics showing the procedure for a RNase R-based library construction protocol for RNA-Seq. **b** Increasing levels of circRNA with the progression of spermiogenesis (from pachytene spermatocytes to round and elongating spermatids). Normalized circRNA reads represent the circRNA levels. Data are presented as sum of two biological replicates (n=2).
