# Supplementary material
Source: PubMed Central journal article supplement (PMC7054367)
Supplement: 41422_2020_279_MOESM3_ESM.pdf [file 41422_2020_279_MOESM3_ESM.pdf]

**a**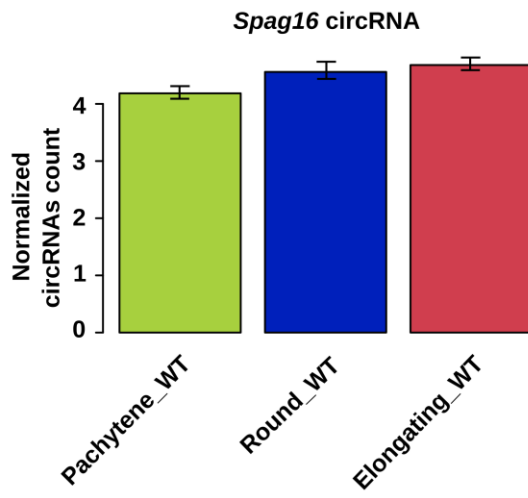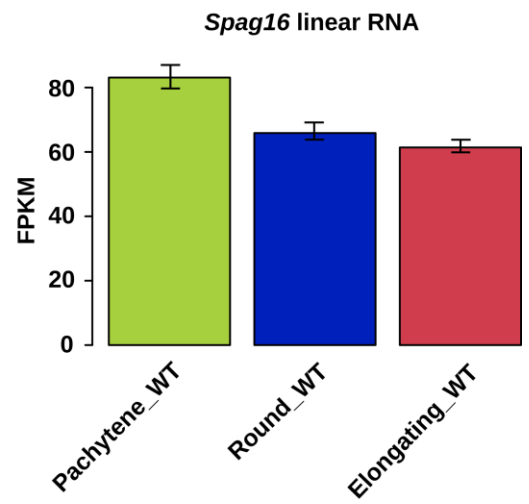**b**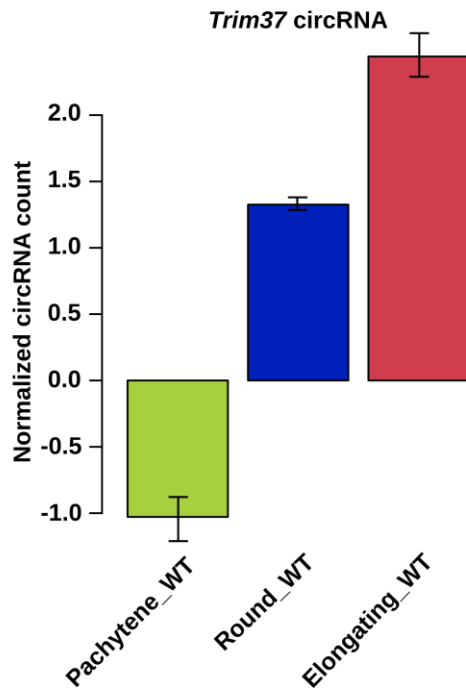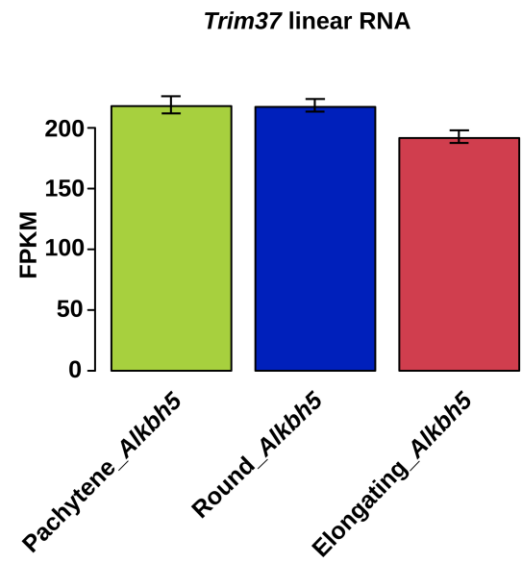

**Fig.S3. Expression levels of *Spaf16* and *Trim37* from pachytene spermatocytes to round and elongating spermatids.** **a** Increased *Spag16* circRNA levels and decreased *Spag16* linear RNAs from spermatocytes to round and elongating spermatids. *Spag16* is known to be involved in nuclear events in post meiotic germ cells. **b** Increased *Trim37* circRNA levels and decreased *Trim37* linear RNAs from spermatocytes to round and elongating spermatids. *Trim37* encodes a member of the (tripartite motif) TRIM family, which is involved in developmental patterning. Data are presented as mean  $\pm$  SD of biological replicates (n=2, two technical repeats data are combined in each biological repeat).
