# Supplementary material
Source: PubMed Central journal article supplement (PMC7054367)
Supplement: 41422_2020_279_MOESM4_ESM.pdf [file 41422_2020_279_MOESM4_ESM.pdf]

**a****GO term of pachytene spermatocyte enriched circRNA**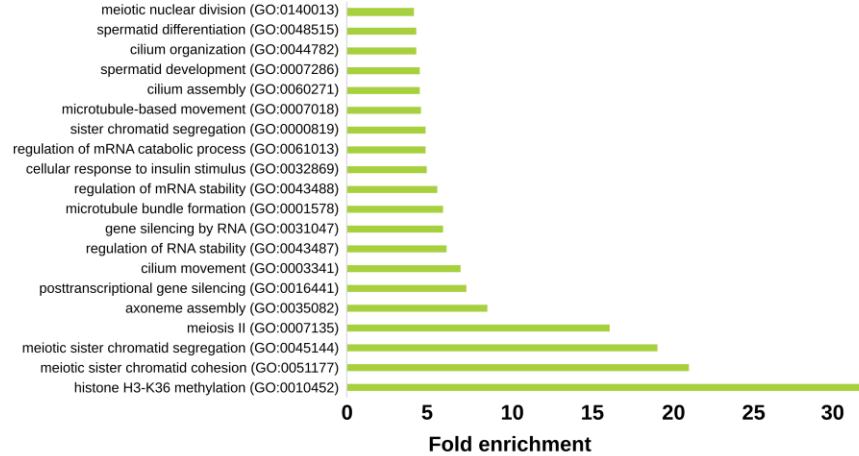**b****GO term of round spermatids enriched circRNA**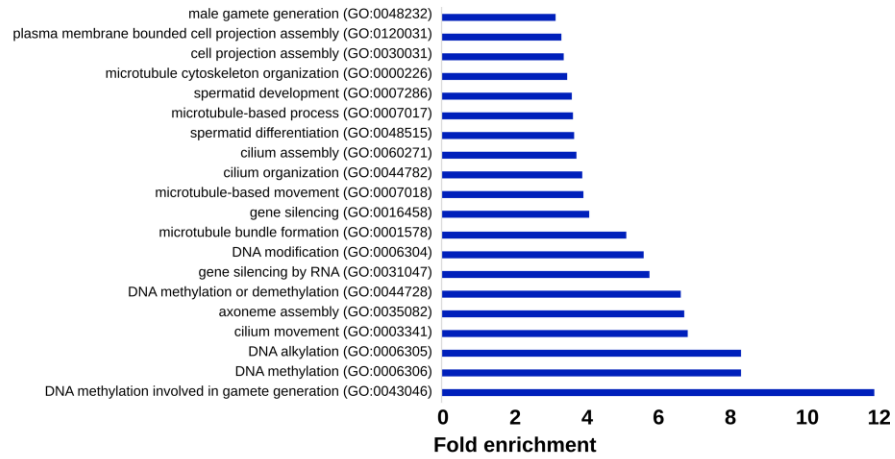**c****GO term of elongating spermatids enriched circRNA**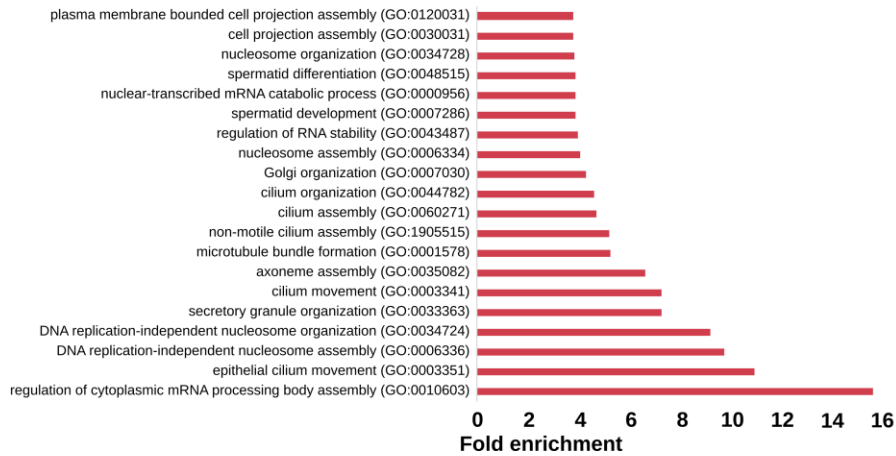

**Fig.S4. Gene Ontology (GO) term enrichment analyses for circRNAs enriched in spermatocytes (a), round (b) and elongating (c) spermatids.**
