# Supplementary material
Source: PubMed Central journal article supplement (PMC7054367)
Supplement: 41422_2020_279_MOESM5_ESM.pdf [file 41422_2020_279_MOESM5_ESM.pdf]

a

| Ladder     | <i>Gapdh</i> |    | <i>Sltm</i><br><i>Circular</i> |    | <i>Alkbh5</i> |    | <i>Sltm</i><br><i>Linear</i> |    |
|------------|--------------|----|--------------------------------|----|---------------|----|------------------------------|----|
| SiRNA (nM) | 100          | 50 | 100                            | 50 | 100           | 50 | 100                          | 50 |

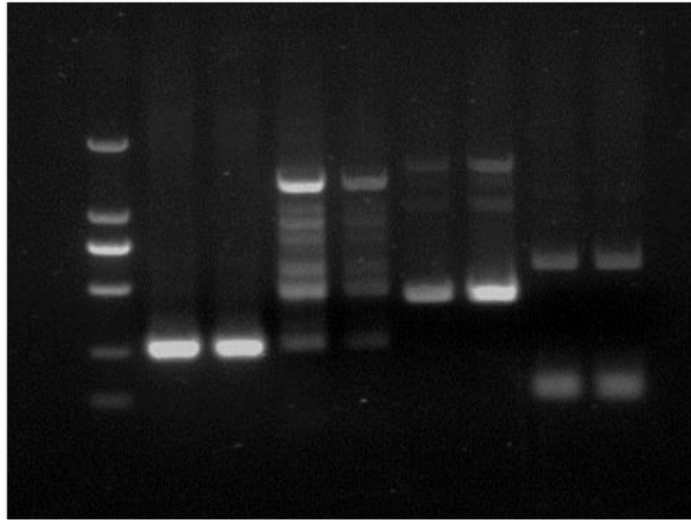

b

| Ladder   | <i>Gapdh</i> |   | <i>Sltm</i><br><i>Circular</i> |   |
|----------|--------------|---|--------------------------------|---|
| minigene | +            | - | +                              | - |

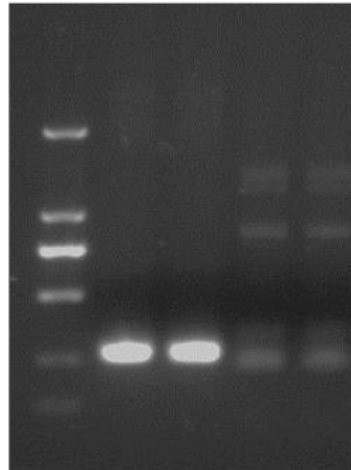

**Supplemental Figure S5. *Alkbh5* knockdown and minigene reporter assays.** **a** A representative result of the *Alkbh5* knockdown assays *in vitro*. Two siRNA concentrations (50 and 100 nM) were used to knock down *Alkbh5*, and semi-quantitative RT-PCR analyses were employed to examine the expression levels. *Gapdh* was used as a loading control. For circRNA detection, primers specific to the junction sequence were used. Experiments were performed in triplicates and similar results were obtained. **b** A representative result of the minigene reporter assays. The minigene reporter was transfected into HEK293 cells. Primers specific to the junction sequences were used for circRNA detection. *Gapdh* was used as a loading control. Two technical repeats were performed with similar results obtained.
