# Supplementary material
Source: PubMed Central journal article supplement (PMC7054367)
Supplement: 41422_2020_279_MOESM6_ESM.pdf [file 41422_2020_279_MOESM6_ESM.pdf]

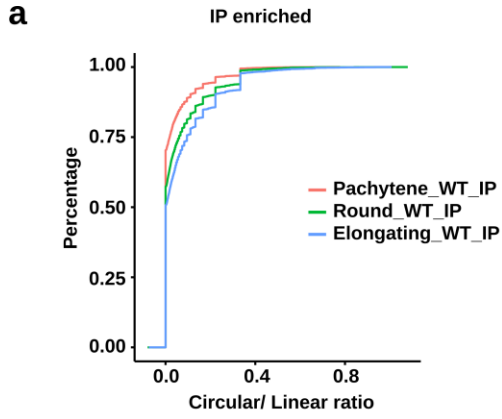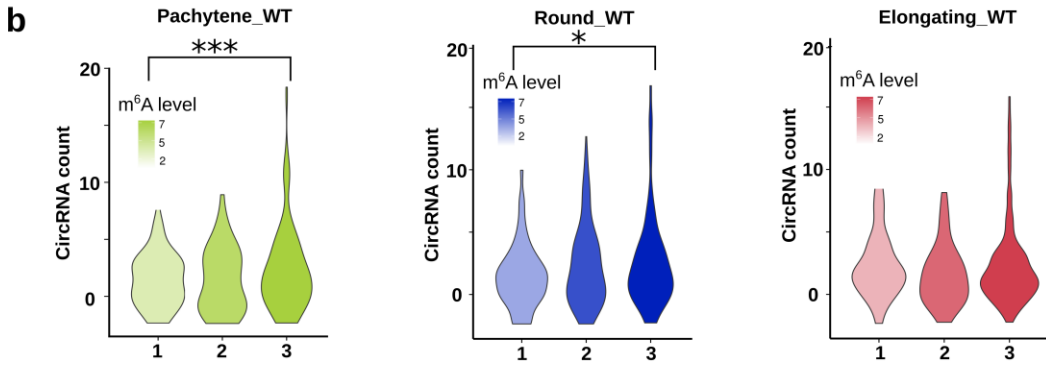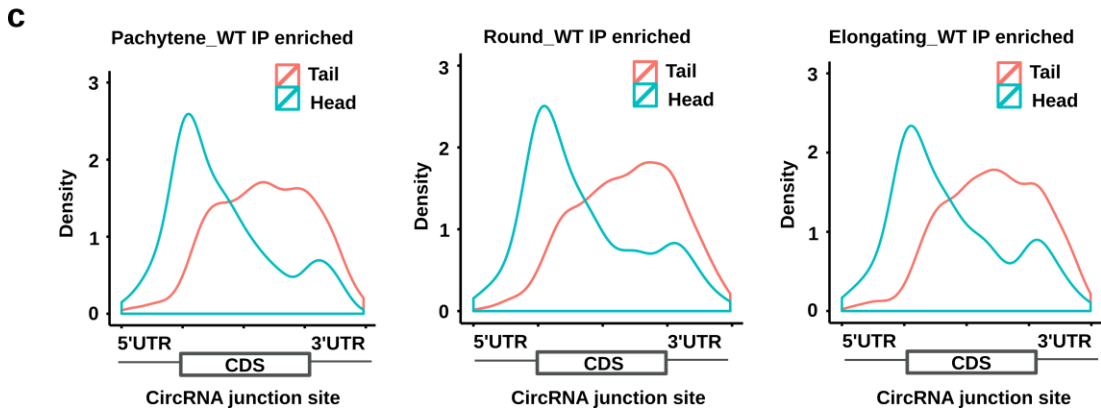

**Fig.S6. circRNA expression and junction site distribution in pachytene spermatocytes, round and elongating spermatids in wild type (WT) mice.** **a** Accumulation curves showing increased circRNA expression from pachytene spermatocytes to round and elongating spermatids. **b** Violin plots showing that circRNA abundance increases with m6A levels in pachytene spermatocytes, round and elongating spermatids. m6A levels (1 to 3) were determined based on how many times a specific m6A site was detected in three biological replicates of experiments. The relative abundance of a circRNAs was determined based on normalized average counts (Biological replicates n=3). **c** Density plots showing m6A-IP-enriched circular RNAs contain coding sequences (CDS) of variable lengths, and the majority contained the start codon and some with the stop codon. Junction reads were divided into head (close to the 5' end) and tail (close to the 3' end) fragments and then mapped against the linear mRNAs (Biological replicates n=3).
