# Supplementary material
Source: PubMed Central journal article supplement (PMC7054367)
Supplement: 41422_2020_279_MOESM7_ESM.pdf [file 41422_2020_279_MOESM7_ESM.pdf]

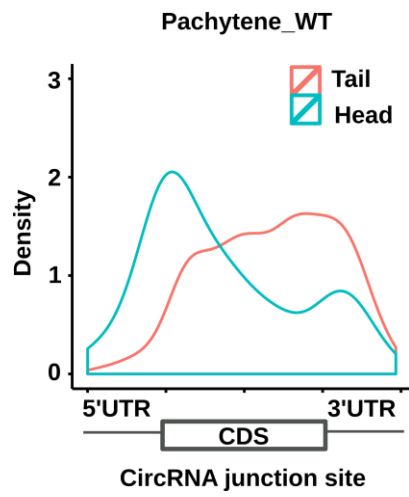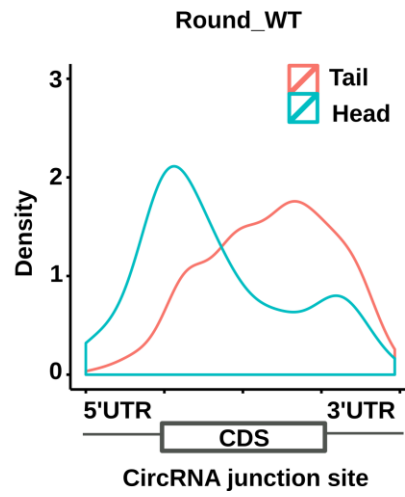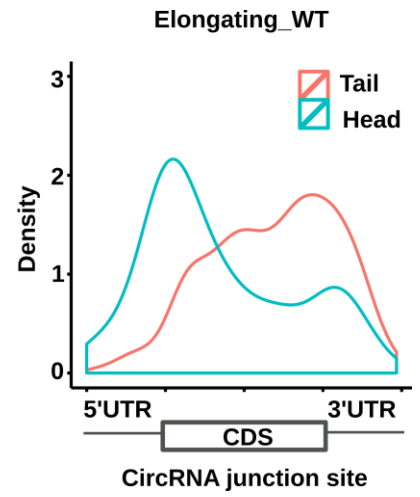

**Fig.S7. Density plots showing the m6A distribution in the junction reads of circRNAs in pachytene spermatocytes, round and elongating spermatids.** Junction reads were divided into head (close to the 5' end) and tail (close to the 3' end) fragments and then mapped against the linear mRNAs (Biological replicates, n=2).
