# Supplementary material
Source: PubMed Central journal article supplement (PMC7054367)
Supplement: 41422_2020_279_MOESM8_ESM.pdf [file 41422_2020_279_MOESM8_ESM.pdf]

**a****Pachytene**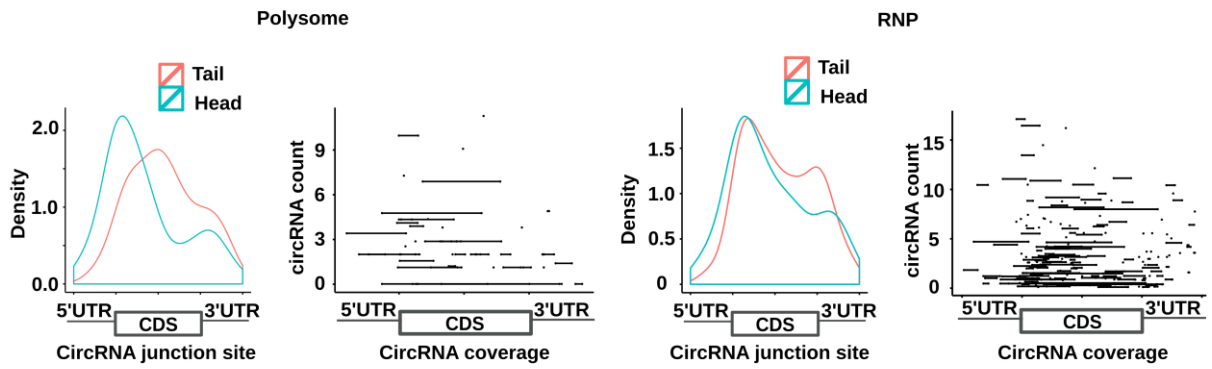**b****Round**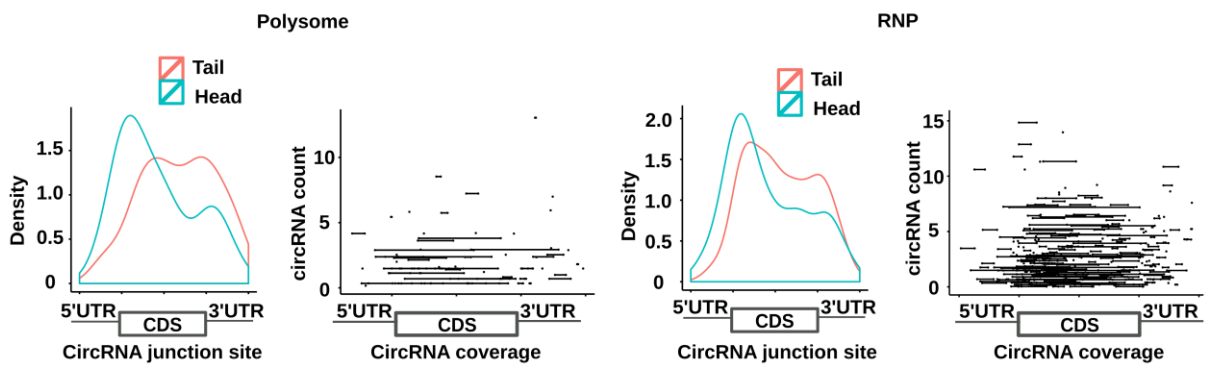**c****Elongating**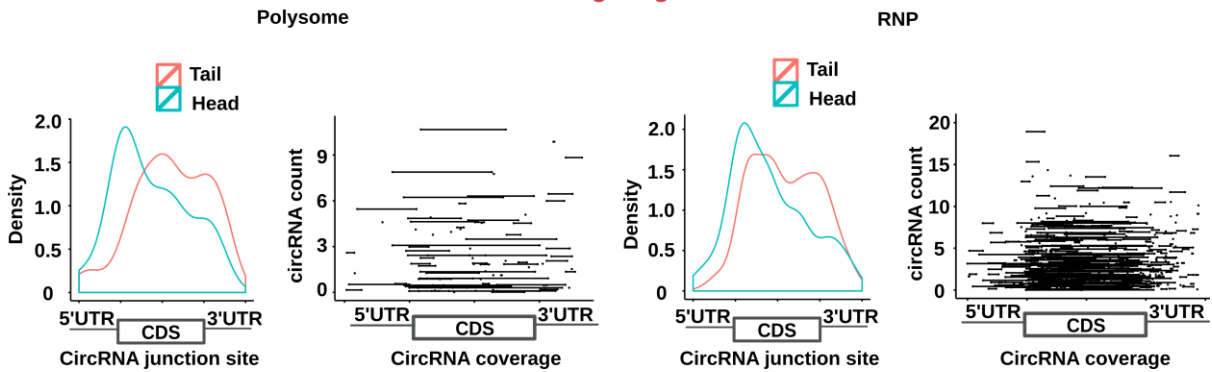

**Fig.S8. circular RNAs associated with the polysomes contain more intact CDS in both round and elongating spermatids.** Density plots of circRNA reads showing distribution of circRNA junction reads along the entire length of the longest mRNAs in pachytene spermatocytes (**a**), round (**b**) and elongating (**c**) spermatids. Biological replicates, n=3.
