# Supplementary material
Source: PubMed Central journal article supplement (PMC7054367)
Supplement: 41422_2020_279_MOESM9_ESM.pdf [file 41422_2020_279_MOESM9_ESM.pdf]

### GO term analysis of "reloading" circRNAs

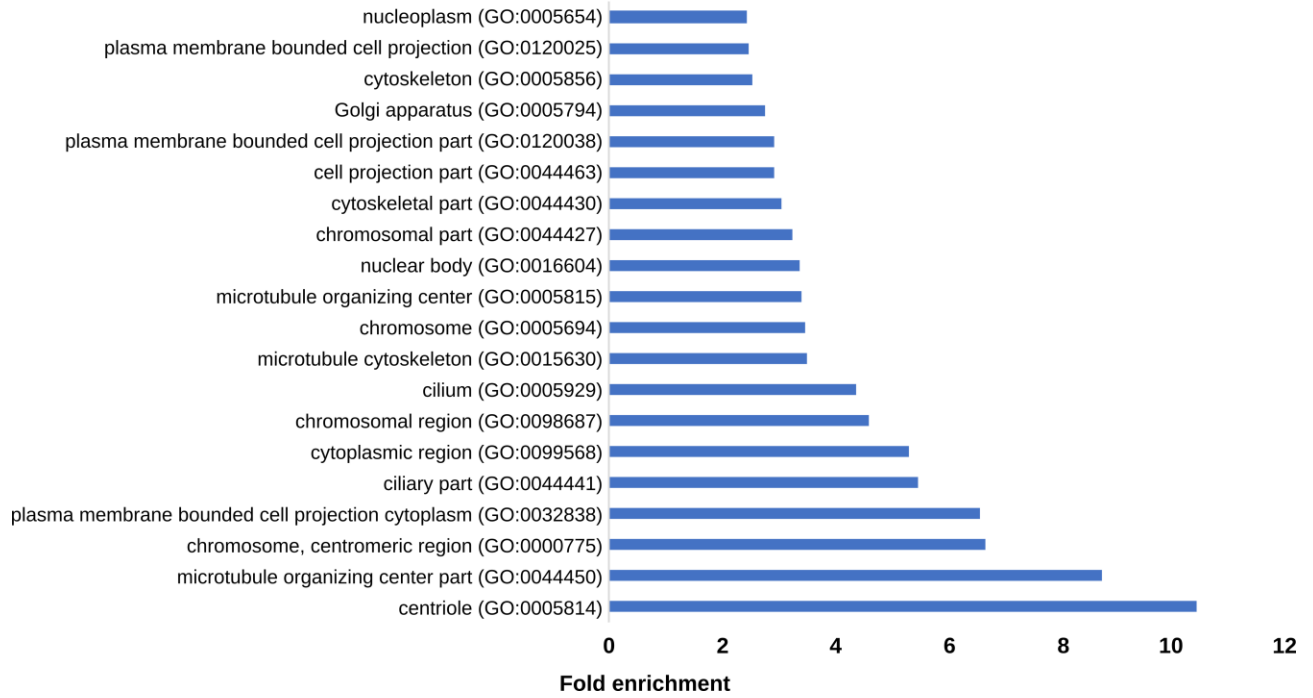

**Fig.S9. GO term analyses on polysome-enriched circRNAs in elongating spermatids.** Significantly enriched GO terms include flagellar development (e.g., cilium, centriole microtubules, etc.) and cellular structural organization (e.g., cytoskeleton, cell projection, etc.). Biological replicates, n=2.
