# Supplementary material
Source: PubMed Central journal article supplement (PMC7054367)
Supplement: 41422_2020_279_MOESM10_ESM.pdf [file 41422_2020_279_MOESM10_ESM.pdf]

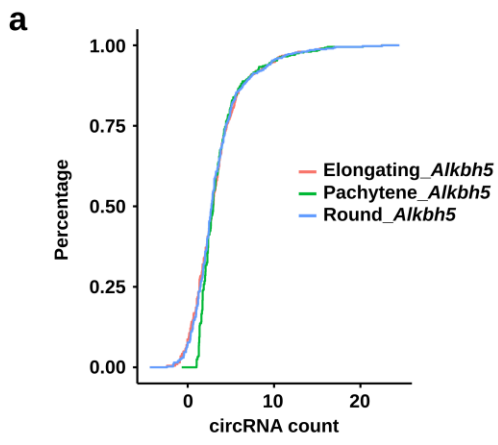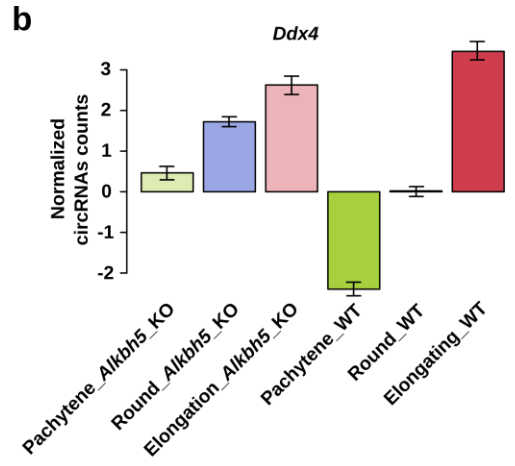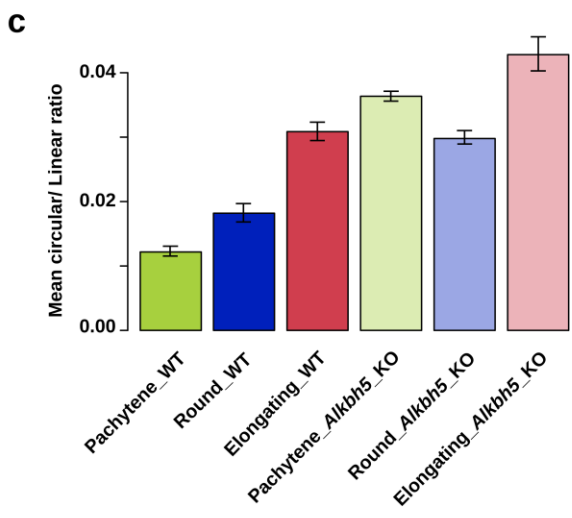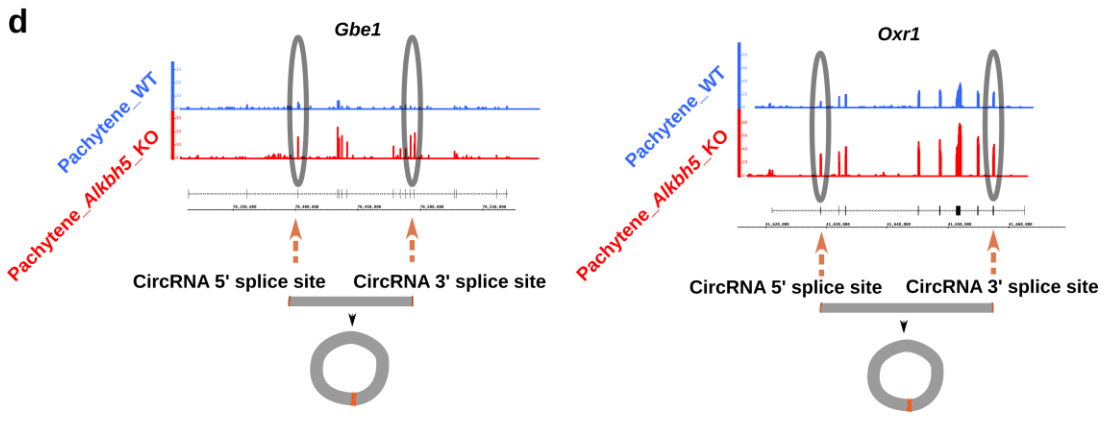

**Fig.S10. Drastically increased circRNA production in the three spermatogenic cell types in *Alkbh5* KO mice.** **a** Accumulation curve showing consistently elevated circRNA levels in all three spermatogenic cells in *Alkbh5* KO testes, which are very different from steadily increased circRNA levels with spermiogenic progress in WT controls (Figure. 1a). Experiments were performed in triplicates. **b** *Ddx4* circRNA levels were much higher in pachytene spermatocytes, round and elongating spermatids from *Alkbh5* KO than from WT testes. **c** The circRNA/linear RNA ratios are much greater in *Alkbh5* KO than in WT pachytene spermatocytes, round and elongating spermatids. **d** Two exemplary genes (*Gbe1* and *Oxr1*) displaying much higher m6A levels near the circRNA splicing sites in *Alkbh5* KO than in WT pachytene spermatocytes (Biological replicates n=2).
