# Supplementary material
Source: PubMed Central journal article supplement (PMC7054367)
Supplement: 41422_2020_279_MOESM12_ESM.pdf [file 41422_2020_279_MOESM12_ESM.pdf]

**a**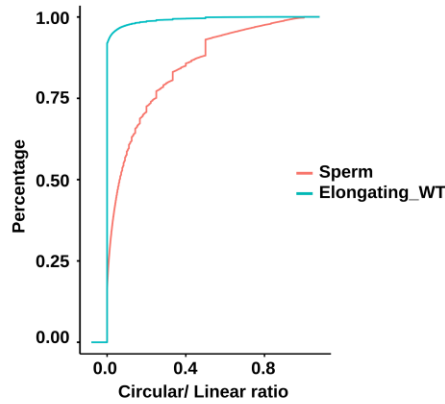**b**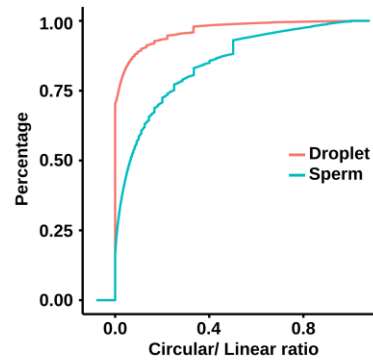**c**

### GO term analysis of sperm-enriched circRNA

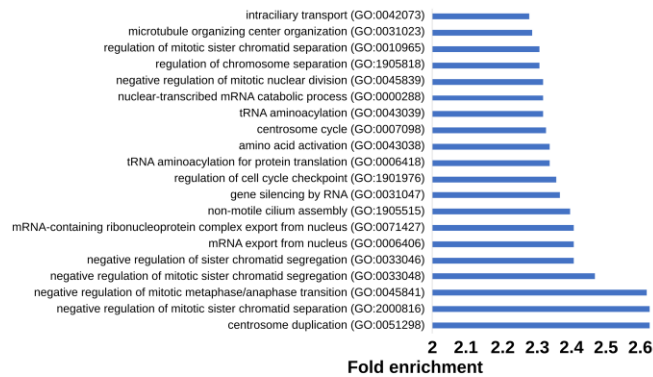**d**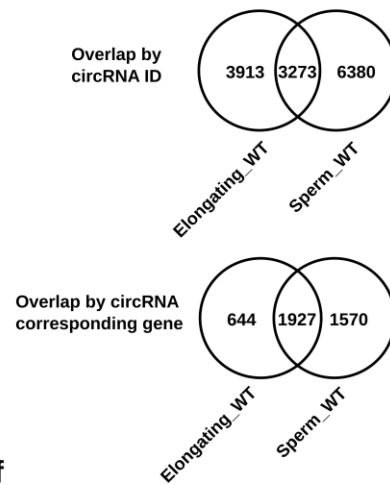**e**

### GO term analysis of age-dependent circRNA

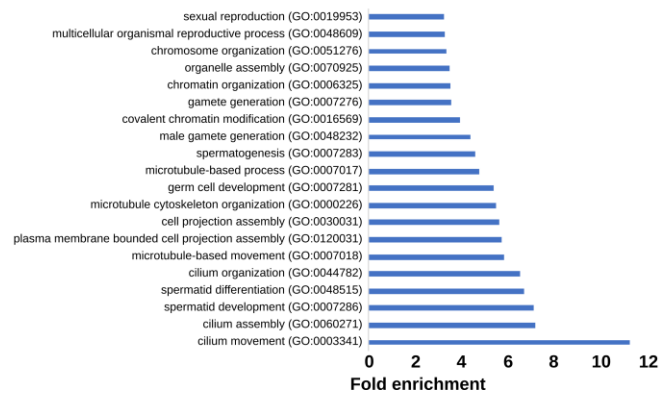**f**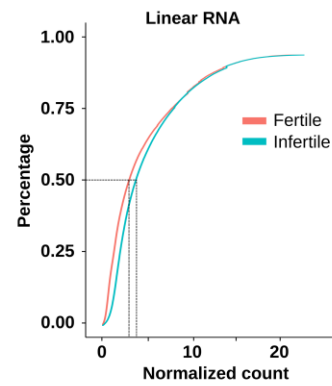

**Fig.S12. Sperm-borne circRNAs.** **a** Accumulation curves showing much greater circRNA/linear ratios in spermatozoa compared to elongating spermatids. **b** Accumulation curves showing much greater circRNA/linear ratios in total spermatozoa compared to cytoplasmic droplets purified from epididymal spermatozoa. **c** GO term analyses of sperm-borne circRNAs. **d** Shared circRNAs between elongating spermatid and epididymal spermatozoa in mice. **e** GO term analyses of age-dependent sperm-borne circRNAs. **f** Accumulation curves showing more linear RNAs in low-fertility sperm than in high-fertility human sperm (Biological replicates n=3).
