# Supplementary material
Source: PubMed Central journal article supplement (PMC7054367)
Supplement: 41422_2020_279_MOESM13_ESM.pdf [file 41422_2020_279_MOESM13_ESM.pdf]

**a**

**GO term analysis of MassSpec identified Pachytene\_WT circRNA**

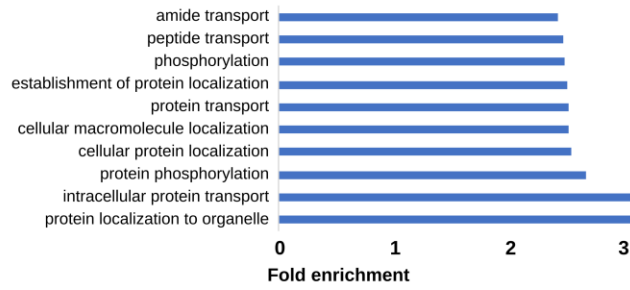

**b**

**GO term analysis of MassSpec identified Round\_WT circRNA**

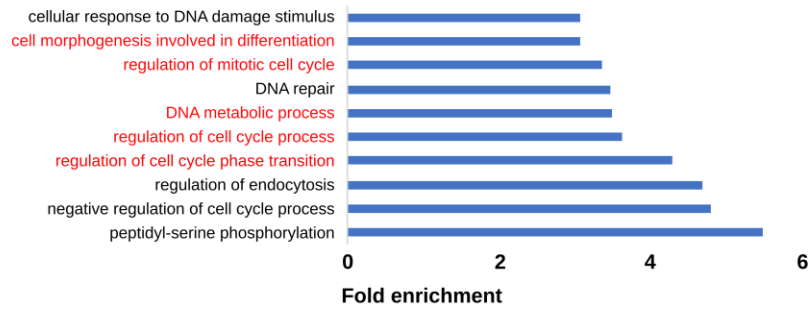

**c**

**GO term analysis of MassSpec identified Elongating\_WT circRNA**

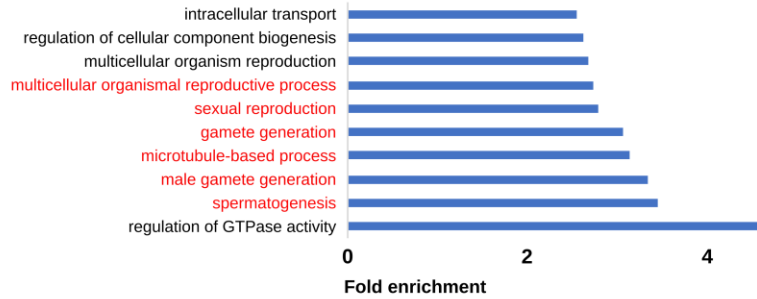

**d**

**GO term analysis of MassSpec identified Sperm\_WT circRNA**

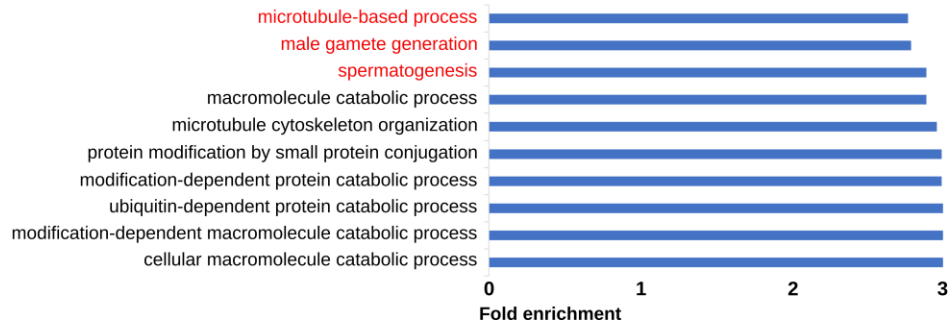

**Fig.S13. GO term enrichment analyses of circRNA genes with circRNA junction peptides detected in LC-MS assays in pachytene spermatocytes (a), round (b) and elongating (c) spermatids, as well as spermatozoa (d). GO terms highly relevant to spermatogenesis are highlighted in red.**
