# Supplementary material
Source: PubMed Central journal article supplement (PMC7054367)
Supplement: 41422_2020_279_MOESM14_ESM.pdf [file 41422_2020_279_MOESM14_ESM.pdf]

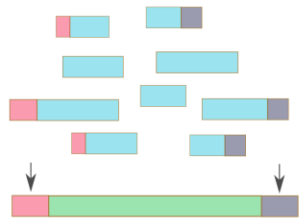

Splicing site identification

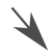

Two splicing sites with genomic sequence in between were concatenated

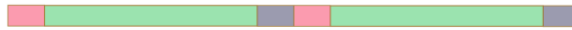

PE reads mapped to concatenated reference

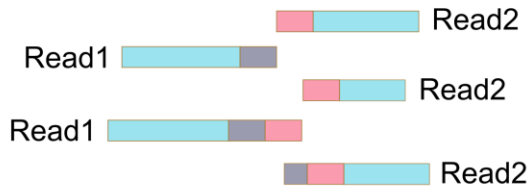

Assemble PE reads with backsplicing sites

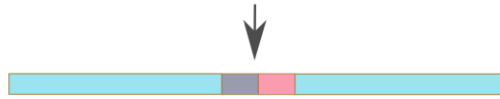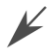

Identifying overlapping contigs to generate full-length circRNA candidates

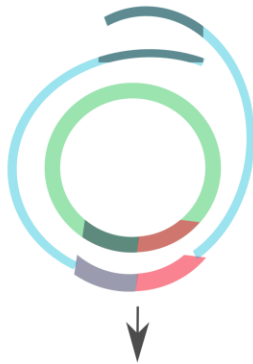

Assess ORF length and quality  
BLASTX validation of protein-coding transcript

Machine learning prediction of coding circRNAs based on ORF and BLASTX evaluation

**Fig.S14. Flow chart showing the method used to identify circRNAs and to evaluate their coding potential.**
